# Supplementary material for: Metabolomic Evaluation of Chronic Periodontal Disease in Older Adults
Source: Hindawi journal article supplement (doi:10.1155/2021/1796204), 2021-01-01

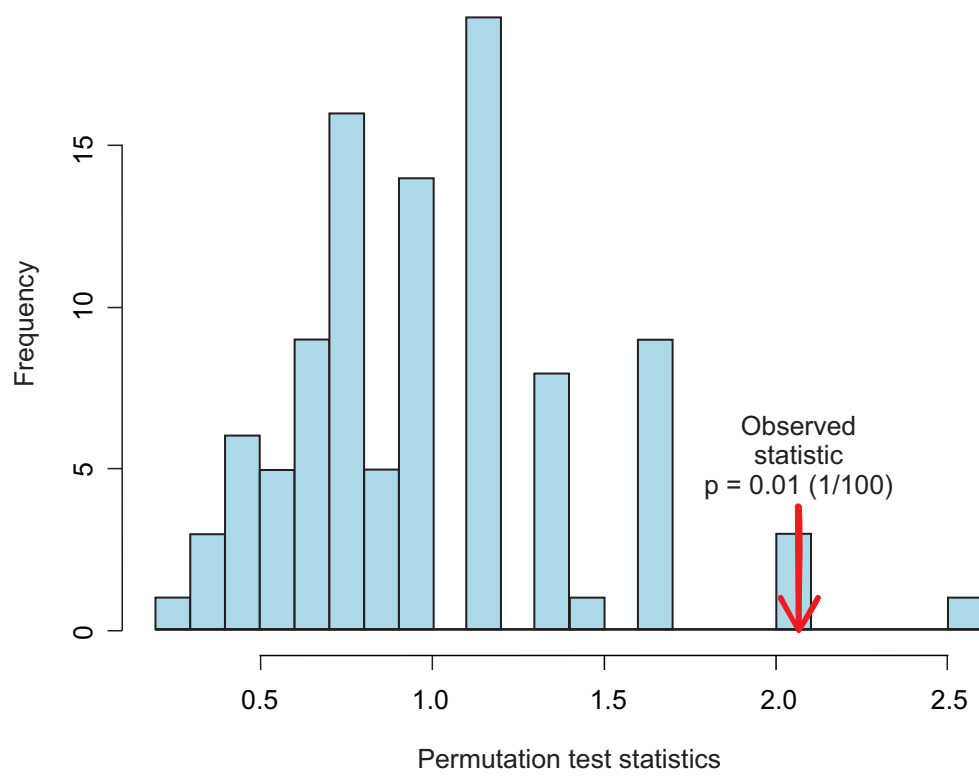

Supplement: f5 [file 1796204.f5.pdf]
